# Supplementary material for: Comparing Patients’ Experiences in Three Differentiated Service Delivery Models for HIV Treatment in South Africa
Source: PubMed Central journal article supplement — Qual Health Res. 2021 Dec 15;32(2):238–54. doi: 10.1177/10497323211050371 (PMC8727825; doi:10.1177/10497323211050371), 2021-12-15
Supplement: sj-pdf-1-qhr-10.1177_10497323211050371.pdf [file sj-pdf-1-qhr-10.1177_10497323211050371.pdf]

**Supplementary file 1: Characteristics of the study participants**

| <b>Characteristics</b>   | <b>Quick Pharmacy<br/>Pick- Up</b> | <b>Community<br/>Adherence<br/>Club</b> | <b>Facility<br/>Adherence<br/>Club</b> | <b>TOTAL</b> |
|--------------------------|------------------------------------|-----------------------------------------|----------------------------------------|--------------|
| <b>Gender</b>            |                                    |                                         |                                        |              |
| Male                     | 9                                  | 11                                      | 9                                      | 29           |
| Female                   | 11                                 | 14                                      | 14                                     | 39           |
| <b>Age (in years)</b>    |                                    |                                         |                                        |              |
| 25 – 35                  | 7                                  | 6                                       | 5                                      | 18           |
| 36 – 45                  | 8                                  | 12                                      | 9                                      | 29           |
| 46+                      | 6                                  | 8                                       | 7                                      | 21           |
| <b>Marital Status</b>    |                                    |                                         |                                        |              |
| Married                  | 10                                 | 10                                      | 7                                      | 27           |
| Single                   | 8                                  | 10                                      | 10                                     | 28           |
| Divorced                 | 1                                  | 1                                       | 0                                      | 2            |
| Widowed                  | 1                                  | 2                                       | 1                                      | 4            |
| In a relationship        | 3                                  | 2                                       | 2                                      | 7            |
| <b>Employment Status</b> |                                    |                                         |                                        |              |
| Employed                 | 16                                 | 17                                      | 12                                     | 45           |
| Unemployed               | 4                                  | 9                                       | 10                                     | 23           |
